# Supplementary material
Source: PubMed Central journal article supplement (PMC373329)
Supplement: nar_32_2_502__1.pdf [file nar_32_2_502__1.pdf]

Supplemental Data Table for NAR-01614-D-2003  
 Farley, A.H., Luning Prak, E.T. and Kazazian, H.H.

| <b>Construct</b>    | <b>5892</b> | <b>1 kb%</b> | <b>4819</b> | <b>2 kb%</b> | <b>3961</b> | <b>3 kb%</b> | <b>nRF</b> | <b>Retrotrans.<br/>Freq.</b> |
|---------------------|-------------|--------------|-------------|--------------|-------------|--------------|------------|------------------------------|
| <u>Experiment 1</u> |             |              |             |              |             |              |            |                              |
| L1 RP               | 48/48       | 100%         | 45/48       | 94%          | 43/48       | 90%          | 47         | 1/136                        |
| L1 RP+L1.2A-RT      | 47/47       | 100%         | 45/47       | 96%          | 42/47       | 89%          | 30         | 1/213                        |
| L1.2A+L1 RP-RT      | 32/32       | 100%         | N.A.        |              | (00/32)     | 0%           | 3          | 1/2113                       |
| L1.2A               | 37/37       | 100%         | 11/37       | 30%          | (03/37)     | 8%           | 1          | 1/6452                       |
| <u>Experiment 2</u> |             |              |             |              |             |              |            |                              |
| L1 RP               | 38/38       | 100%         | 34/38       | 96%          | 33/38       | 87%          | 52         | 1/70                         |
| Total               |             |              |             |              |             |              |            |                              |
|                     | 1 (16/16)   | 100%         | (15/16)     | 94%          | (14/16)     | 88%          |            | 1/57                         |
|                     | 2 (22/22)   | 100%         | (19/22)     | 86%          | (19/22)     | 86%          |            | 1/83                         |
| RP R363G            | 60/60       | 100%         | 51/60       | 85%          | 30/60       | 50%          | 19         | 1/189                        |
| Total               |             |              |             |              |             |              |            |                              |
|                     | 1 (12/12)   | 100%         | (11/12)     | 92%          | (07/12)     | 58%          |            | 1/148                        |
|                     | 2 (16/16)   | 100%         | 14/16       | 88%          | (10/16)     | 63%          |            | 1/178                        |
|                     | 3 (16/16)   | 100%         | 16/16       | 100%         | (10/16)     | 63%          |            | 1/220                        |
|                     | 4 (16/16)   | 100%         | (10/16)     | 63%          | (03/16)     | 19%          |            | 1/212                        |
| L1.3                | 16/16       | 100%         | (11/16)     | 69%          | (05/16)     | 31%          | 20         | 1/175                        |
| <b>Construct</b>    | <b>5892</b> | <b>1 kb%</b> | <b>4819</b> | <b>2 kb%</b> | <b>3961</b> | <b>3 kb%</b> | <b>nRF</b> | <b>Retrotrans.<br/>Freq.</b> |
| L1.2A               | 64/64       | 100%         | (10/64)     | 16%          | (05/64)     | 8%           | 1          | 1/3590                       |

|                     |         |      |         |     |         |     |   |        |
|---------------------|---------|------|---------|-----|---------|-----|---|--------|
| L1.2 G363R<br>Total | 43/43   | 100% | 09/43   | 21% | 05/43   | 12% | 2 | 1/1792 |
| 1                   | (14/14) | 100% | (03/14) | 21% | (01/14) | 7%  |   | 1/1860 |
| 2                   | (15/15) | 100% | (06/15) | 40% | (03/15) | 20% |   | 1/1633 |
| 3                   | (14/14) | 100% | (04/14) | 29% | (01/14) | 7%  |   | 1/1882 |

Experiment 3

|                |         |      |         |      |         |      |    |        |
|----------------|---------|------|---------|------|---------|------|----|--------|
| LRE 3<br>Total | 94/94   | 100% | 90/94   | 96%  | 84/94   | 89%  | 60 | 01/13  |
| 1              | (18/18) | 100% | (18/18) | 100% | (15/18) | 83%  |    | (1/13) |
| 2              | (17/17) | 100% | (15/17) | 88%  | (14/17) | 82%  |    | (1/14) |
| 3              | (35/35) | 100% | (33/35) | 94%  | (31/35) | 89%  |    | (1/10) |
| 4              | (24/24) | 100% | (24/24) | 100% | (24/24) | 100% |    | (1/15) |
| L1 RP<br>Total | 46/46   | 100% | 45/46   | 98%  | 41/46   | 89%  | 40 | 01/18  |
| 1              | (24/24) | 100% | (24/24) | 100% | (23/24) | 96%  |    | (1/14) |
| 2              | (22/22) | 100% | (21/22) | 95%  | (18/22) | 82%  |    | (1/21) |

| <b>Construct</b>        | <b>5892</b> | <b>1 kb%</b> | <b>4819</b> | <b>2 kb%</b> | <b>3961</b> | <b>3 kb%</b> | <b>nRF</b> | <b>Retrotrans.<br/>Freq.</b> |
|-------------------------|-------------|--------------|-------------|--------------|-------------|--------------|------------|------------------------------|
| L1.3<br>Total           | 31/31       | 100%         | 21/31       | 68%          | 16/31       | 52%          | 5.5        | 1/152                        |
|                         | 1 (24/24)   | 100%         | (16/24)     | 67%          | (12/24)     | 50%          |            | (1/131)                      |
|                         | 2 (07/07)   | 100%         | (05/07)     | 71%          | (04/07)     | 57%          |            | (1/173)                      |
| L1 RP+L1.2A-RT<br>Total | 28/28       | 100%         | 20/28       | 71%          | 10/28       | 36%          | 21         | 1/39                         |
|                         | 1 (18/18)   | 100%         | (14/18)     | 78%          | (07/18)     | 39%          |            | (01/31)                      |
|                         | 2 (10/10)   | 100%         | (06/10)     | 60%          | (03/10)     | 30%          |            | (1/47)                       |
| L1.2A+L1 RP-RT<br>Total | 54/54       | 100%         | 20/54       | 37%          | (06/54)     | 11.00%       | 2          | 1/431                        |
|                         | 1 (22/22)   | 100%         | (04/22)     | 18%          | (00/22)     | 0.00%        |            | (1/475)                      |
|                         | 2 (32/32)   | 100%         | (16/32)     | 50%          | (06/32)     | 19.00%       |            | (1/387)                      |
| L1.2A<br>Total          | 54/54       | 100%         | 16/54       | 30%          | (05/54)     | 9%           | 1          | 1/838                        |
|                         | 1 (38/38)   | 100%         | (12/38)     | 32%          | (04/38)     | 11%          |            | (1/820)                      |
|                         | 2 (16/16)   | 100%         | (04/16)     | 25%          | (1/16)      | 6%           |            | (1/856)                      |

| <b>Construct</b>                  | <b>5892</b> | <b>1 kb%</b> | <b>4819</b> | <b>2 kb%</b> | <b>3961</b> | <b>3 kb%</b> | <b>nRF</b> | <b>Retrotrans.<br/>Freq.</b> |
|-----------------------------------|-------------|--------------|-------------|--------------|-------------|--------------|------------|------------------------------|
| L1.2A<br>L1259S/M1220I<br>(L1.2B) | 19/19       | 100%         | 13/19       | 68%          | (09/19)     | 47%          | 15         | 1/55                         |
| L1.2 L1259S                       | 20/20       | 100%         | 16/20       | 80%          | (09/20)     | 45%          | 7.4        | 1/113                        |
| L1.2 M1220I                       | 17/17       | 100%         | (09/17)     | 53%          | (03/17)     | 18%          | 3.7        | 1/223                        |
| RP<br>S1259L/I1220M               | 21/21       | 100%         | 14/21       | 67%          | (06/21)     | 29%          | 6.3        | 1/133                        |
| RP S1259L                         | 24/24       | 100%         | 19/24       | 79%          | 13/24       | 54%          | 16         | 1/52                         |
| RP I1220M                         | 24/24       | 100%         | 23/24       | 96%          | 21/24       | 88.00%       | 36         | 1/23                         |

Legend:

The L1 constructs used are listed in the first column. For a detailed explanation of construct abbreviations, please see figure 2 in the manuscript. Individual experiments are listed, as are individual transfections from each of the experiments. 5892, 4819, 3921 are the map positions of the ruler PCR primers corresponding to the 1 kb, 2 kb and 3 kb PCR assays, respectively. The raw numbers (fractions) of clones that are positive in each of the assays are shown, followed by the percentages. The raw retrotransposition frequencies are given as fractions and the normalized retrotransposition frequencies (nRF) are also listed. The nRF is calculated by normalizing the observed retrotransposition frequency to that of the weakest element, L1.2A in the same series of transfections (see text for details).
